# Supplementary material
Source: Research Square preprint supplement (doi:10.21203/rs.3.rs-9047487/v1)
Supplement: Supplementary file 1 [file 5f040d38885298e129de7ad6.docx]

**Table 1. Hierarchical regression models predicting COVID-19 vaccination intentions across W1–W3**

| **Variable** | **R1** | | | | | | | **R2** | | | | | | | **R3** | | | | | | |
| --- | --- | --- | --- | --- | --- | --- | --- | --- | --- | --- | --- | --- | --- | --- | --- | --- | --- | --- | --- | --- | --- |
| **The intention for first-time COVID-19 vaccine** | | | | | | | **The intention for COVID-19 booster** | | | | | | | **The intention for COVID-19 booster** | | | | | | |
| **Model 1.1** | **Model 1.2** | **Model 1.3** | **Model 1.4** | **Model 1.5** | **Model 1.6** | **Model 1.7** | **Model 2.1** | **Model 2.2** | **Model 2.3** | **Model**  **2.4** | **Model 2.5** | **Model 2.6** | **Model 2.7** | **Model 3.1** | **Model 3.2** | **Model 3.3** | **Model 3.4** | **Model 3.5** | **Model 3.6** | **Model 3.7** |
| *β* (p) | *β* (p) | *β* (p) | *β (p)* | *β (p)* | *β* (p) | *β* (p) | *β* (p) | *β* (p) | *β* (p) | *β* (p) | *β* (p) | *β* (p) | *β* (p) | *β* (p) | *β* (p) | *β* (p) | *β* (p) | *β* (p) | *β* (p) | *β* (p) |
| **Block1** |  |  |  |  |  |  |  |  |  |  |  |  |  |  |  |  |  |  |  |  |  |
| Age | 0.043（0.168） | 0.022（0.436） | 0.022（0.429） | 0.022（0.444） | 0.019（0.498） | 0.017（0.54） | 0.017（0.547） | -0.034（0.628） | -0.035（0.616） | -0.042（0.55） | -0.043  (0.538) | -0.043（0.541） | -0.051（0.46） | -0.05（0.463） | -0.005（0.243） | 0  （0.961） | -0.001（0.721） | -0.001（0.764） | -0.002（0.662） | -0.002（0.59） | -0.002（0.584） |
| Gender | 0.099（0.098） | 0.131*（0.018） | 0.1（0.071） | 0.09（0.103） | 0.088（0.109） | 0.1（0.068） | 0.104（0.057） | -0.033（0.767） | -0.024（0.829） | -0.063（0.56） | -0.062（0.568） | -0.06（0.582） | -0.068（0.527） | -0.068（0.527） | -0.135*（0.02） | -0.009（0.85） | -0.029（0.56） | -0.028（0.576） | -0.027（0.584） | -0.04  （0.416） | -0.039（0.424） |
| Education | 0.114***（0） | 0.088**（0.002） | 0.08**（0.005） | 0.067*（0.021） | 0.065*（0.025） | 0.065*（0.023） | 0.067*（0.02） | 0.059（0.29） | 0.071（0.206） | 0.056（0.317） | 0.053（0.342） | 0.053（0.349） | 0.033（0.549） | 0.033（0.548） | -0.069（0.018） | -0.046（0.067） | -0.051（0.038） | -0.046（0.067） | -0.047（0.064） | -0.045（0.071） | -0.045（0.072） |
| Income | 0.072（0.053） | 0.034（0.314） | 0.042（0.219） | 0.043（0.199） | 0.045（0.18） | 0.049（0.144） | 0.051（0.129） | 0.079（0.242） | 0.076（0.26） | 0.067（0.31） | 0.068（0.309） | 0.067（0.315） | 0.057（0.38） | 0.057（0.381） | -0.04（0.197） | -0.055（0.039） | -0.041（0.12） | -0.042（0.118） | -0.04（0.138） | -0.038（0.153） | -0.037（0.154） |
| **Block2** |  |  |  |  |  |  |  |  |  |  |  |  |  |  |  |  |  |  |  |  |  |
| PRP |  | -0.046（0.051） | -0.006（0.811） | -0.005（0.841） | -0.006（0.803） | -0.015（0.533） | -0.013（0.605） |  | 0.174***（0） | 0.229***（0） | 0.233***（0） | 0.229***（0） | 0.152*（0.014） | 0.152*（0.014） |  | 0.232***（0） | 0.257***（0） | 0.257***（0） | 0.254***（0） | 0.222***（0） | 0.222***（0） |
| PBPV |  | 0.709***（0） | 0.663***（0） | 0.648***（0） | 0.647***（0） | 0.588***（0） | 0.588***（0） |  | 0.202***（0） | 0.243**（0.001） | 0.241**（0.001） | 0.241**（0.001） | 0.174*（0.019） | 0.173*（0.02） |  | 0.514***（0） | 0.505***（0） | 0.504***（0） | 0.495***（0） | 0.401***（0） | 0.401***（0） |
| **Block3** |  |  |  |  |  |  |  |  |  |  |  |  |  |  |  |  |  |  |  |  |  |
| VCTB |  |  | -0.132***（0） | -0.12***（0） | -0.128***（0） | -0.112***（0） | -0.117***（0） |  |  | -0.342***（0） | -0.336***（0） | -0.341***（0） | -0.229**（0.002） | -0.23**（0.002） |  |  | -0.122***（0） | -0.132***（0） | -0.132***（0） | -0.116***（0） | -0.115***（0） |
| Block4 |  |  |  |  |  |  |  |  |  |  |  |  |  |  |  |  |  |  |  |  |  |
| SL |  |  |  | 0.029**（0.005） | 0.03**（0.004） | 0.027**（0.01） | 0.028**（0.007） |  |  |  | 0.007（0.781） | 0.008  (0.739) | 0.001（0.963） | 0.001（0.974） |  |  |  | -0.008（0.276） | -0.007（0.341） | -0.007（0.366） | -0.007（0.366） |
| Block5 |  |  |  |  |  |  |  |  |  |  |  |  |  |  |  |  |  |  |  |  |  |
| SL×VCTB |  |  |  |  | -0.014（0.103） | -0.01（0.253） | -0.01（0.233） |  |  |  |  | -0.012（0.644） | -0.001（0.961） | -0.001（0.978） |  |  |  |  | -0.016*（0.043） | -0.011（0.159） | -0.011（0.157） |
| Block6 |  |  |  |  |  |  |  |  |  |  |  |  |  |  |  |  |  |  |  |  |  |
| ET |  |  |  |  |  | 0.122***（0） | 0.111***（0） |  |  |  |  |  | 0.303***（0） | 0.302***（0） |  |  |  |  |  | 0.214***（0） | 0.215***（0） |
| Block7 |  |  |  |  |  |  |  |  |  |  |  |  |  |  |  |  |  |  |  |  |  |
| ET×VCTB |  |  |  |  |  |  | 0.039（0.056） |  |  |  |  |  |  | -0.001（0.94） |  |  |  |  |  |  | -0.004（0.901） |
| **Model statistics** |  |  |  |  |  |  |  |  |  |  |  |  |  |  |  |  |  |  |  |  |  |
| F | 7.648***（0） | 63.387***（0） | 58.859***（0） | 52.693***（0） | 47.175***（0） | 45.845***（0） | 42.069***（0） | 1.089（0.361) | 3.457***（0） | 6.418***（0） | 5.621***（0） | 5.017***（0） | 9.488***（0） | 8.618***（0） | 4.397**（0.001） | 68.163***（0） | 62.368***（0） | 54.731***（0） | 49.252***（0） | 48.823***（0） | 44.343***（0） |
| R2 | 0.016 | 0.168 | 0.18 | 0.183 | 0.184 | 0.196 | 0.198 | 0.004 | 0.018 | 0.038 | 0.038 | 0.038 | 0.076 | 0.076 | 0.017 | 0.285 | 0.299 | 0.3 | 0.302 | 0.323 | 0.323 |
| Adjusted R2 | 0.014 | 0.165 | 0.177 | 0.18 | 0.18 | 0.192 | 0.193 | 0 | 0.013 | 0.032 | 0.031 | 0.03 | 0.068 | 0.067 | 0.013 | 0.281 | 0.294 | 0.294 | 0.296 | 0.317 | 0.316 |

**Note: PRP=Personal risk perception, PBPV= Personal benefit perception vaccine, VCTB=Vaccine conspiracy theory belief, SL=Science literacy, ET= Expert trust. * p < .05. ** p < .01. *** p < .00**

**Table2. Hierarchical regression models predicting influenza vaccination intentions in W3 and W4**

| **Variable** | **R4** | | | | | | | **R5** | | | | | | |
| --- | --- | --- | --- | --- | --- | --- | --- | --- | --- | --- | --- | --- | --- | --- |
| **The intention for influenza vaccine** | | | | | | | **The intention for influenza vaccine** | | | | | | |
| **Model4.1** | **Model 4.2** | **Model 4.3** | **Model4.4** | **Model 4.5** | **Model 4.6** | **Model 4.7** | **Model 5.1** | **Model 5.2** | **Model 5.3** | **Model 5.4** | **Model 5.5** | **Model 5.6** | **Model 5.7** |
| *β* (*p*) | *β* (*p*) | *β* (*p*) | *β* (*p*) | *β* (*p*) | *β* (*p*) | *β* (*p*) | *β* (*p*) | *β* (*p*) | *β* (*p*) | *β* (*p*) | *β* (*p*) | *β* (*p*) | *β* (*p*) |
| **Block1** |  |  |  |  |  |  |  |  |  |  |  |  |  |  |
| Age | -0.011（0.08） | -0.008（0.129） | -0.009（0.097） | -0.009（0.104） | -0.009（0.107） | -0.007（0.161） | -0.007（0.199） | 0.059***(0) | 0.023(0.068) | 0.021（0.097） | 0.021（0.099） | 0.021（0.099） | 0.019（0.097） | 0.019（0.108） |
| Gender | -0.045（0.568） | 0.049（0.497） | 0.029（0.683） | 0.031（0.669） | 0.039（0.587） | -0.004（0.587） | -0.012（0.87） | -0.115**(0.004) | -0.023(0.445) | -0.023（0.446） | -0.022（0.461） | -0.022（0.473） | 0.016（0.566） | 0.013（0.651） |
| Education | -0.045（0.278） | -0.054（0.147） | -0.053（0.152） | -0.048（0.206） | -0.052（0.174） | -0.045（0.174） | -0.047（0.201） | 0(0.995) | -0.002(0.9) | -0.003（0.854） | -0.003（0.857） | -0.003（0.871） | -0.004（0.821） | -0.003（0.84） |
| Income | 0(0.992) | 0.006（0.886） | 0.011（0.774） | 0.01（0.76） | 0.019（0.614） | 0.019（0.614） | 0.02（0.582） | 0.046(0.058) | 0.036(0.043) | 0.038*（0.037） | 0.038*（0.036） | 0.038*（0.034） | 0.029（0.085） | 0.027（0.107） |
| **Block2** |  |  |  |  |  |  |  |  |  |  |  |  |  |  |
| PRPC |  | 0.24***（0） | 0.252***（0） | 0.251***（0） | 0.246***（0） | 0.2***（0） | 0.191***（0） |  | 0.264***（0） | 0.28***（0） | 0.279***（0） | 0.275***（0） | 0.216***（0） | 0.209***（0） |
| PBPV |  | 0.419***（0） | 0.411***（0） | 0.411***（0） | 0.399***（0） | 0.288***（0） | 0.304***（0） |  | 0.563***（0） | 0.559***（0） | 0.56***（0） | 0.554***（0） | 0.393***（0） | 0.369***（0） |
| **Block3** |  |  |  |  |  |  |  |  |  |  |  |  |  |  |
| VCTB |  |  | -0.004212 | -0.00356 | -0.075（0.084） | -0.053（0.207） | -0.063（0.136） |  |  | -0.033*（0.029） | -0.036*（0.031） | -0.028（0.107） | 0.013（0.425） | 0.045*（0.015） |
| **Block4** |  |  |  |  |  |  |  |  |  |  |  |  |  |  |
| SL |  |  |  | -0.007（0.5） | -0.006（0.566） | 0（0.99） | 0.001（0.907） |  |  |  | -0.026（0.7） | -0.02（0.769） | -0.046（0.467） | -0.056（0.367） |
| **Block5** |  |  |  |  |  |  |  |  |  |  |  |  |  |  |
| SL×VCTB |  |  |  |  | -0.033*（0.016） | -0.023（0.092） | -0.019（0.157） |  |  |  |  | -0.081（0.176） | -0.022（0.697） | -0.028（0.621） |
| **Block6** |  |  |  |  |  |  |  |  |  |  |  |  |  |  |
| ET |  |  |  |  |  | 0.282***（0） | 0.277***（0） |  |  |  |  |  | 0.128***（0） | 0.131***（0） |
| **Block7** |  |  |  |  |  |  |  |  |  |  |  |  |  |  |
| ET×VCTB |  |  |  |  |  |  | 0.089*（0.05） |  |  |  |  |  |  | -0.024***（0） |
| **Model statistics** |  |  |  |  |  |  |  |  |  |  |  |  |  |  |
| F | 1.487（0.205） | 24.876***（0） | 21.975***（0） | 19.266***（0） | 17.929***（0） | 20.380***（0） | 18.973***（0） | 7.392（0） | 276.585***（0） | 238.193***（0） | 208.35***（0） | 185.479***（0） | 221.531***（0） | 204.085***（0） |
| R2 | 0.011 | 0.214 | 0.219 | 0.22 | 0.228 | 0.272 | 0.277 | 0.014 | 0.45 | 0.451 | 0.451 | 0.452 | 0.522 | 0.526 |
| Adjusted R2 | 0.003 | 0.205 | 0.209 | 0.208 | 0.215 | 0.259 | 0.263 | 0.012 | 0.448 | 0.449 | 0.449 | 0.449 | 0.52 | 0.523 |

**Note: PRP=Personal risk perception, PBPV= Personal benefit perception vaccine, VCTB=Vaccine conspiracy theory belief, SL=Science literacy, ET= Expert trust. * p < .05. ** p < .01. *** p < .00**
