# Supplementary material
Source: Research Square preprint supplement (doi:10.21203/rs.3.rs-9047487/v1)
Supplement: Supplementary file 2 [file 76cc240bde2caf514c5f7a8d.docx]

**Table S1. Demographic characteristics of respondents across the four survey waves**

| **Variable** | **W1:1890** | **W2:1159** | **W3:1033** | **W4:2037** |
| --- | --- | --- | --- | --- |
| **Gender** |  |  |  |  |
| Male | 964 (51%) | 610(52.6%) | 608(58.9%) | 1046(51.4%) |
| Female | 926 (49%) | 549(47.4%) | 425(41.1 %) | 991(48.6%) |
| **Age** |  |  |  |  |
| 18-29 | 421 (22.3%) | 6(0.5%) | 842(81.5%) | 610(29.9%) |
| 30-39 | 496 (26.2%) | 425(36.7 %) | 137(13.3 %) | 404(19.8%) |
| 40-49 | 509 (26.9%) | 373(32.2%) | 40(3.9 %) | 345(16.9%) |
| 50-59 | 464 (24.6%) | 273(23.6 %) | 9(0.9%) | 386(18.9%) |
| 60 and above | / | 82(7.1 %) | 5(0.5%) | 292(14.3%) |
| **Education Level** |  |  |  |  |
| Junior high or below | 240 (12.7%) | 168(14.5 %) | 439(42.5 %) | 642(31.5%) |
| High school | 336 (17.8%) | 246(21.2 %) | 308(29.8 %) | 472(23.2%) |
| Junior college | 654 (34.6%) | 283(24.4 %) | 187(18.1%) | 465(22.8%) |
| Bachelor | 620 (32.8%) | 428(36.9 %) | 71(6.9%) | 435(21.4%) |
| Master and above | 40 (2.1%) | 34(2.9%) | 28(2.7 %) | 23(1.1%) |
| **Monthly Income** |  |  |  |  |
| Below 3000 | 493 (26.1%) | 218(18.8 %) | 365(35.3%) | 424(20.8%) |
| 3001-5000 | 696 (36.8%) | 532(45.9%) | 297(28.8%) | 669(32.8%) |
| 5001-10000 | 558 (29.5%) | 290(25.0 %) | 229(22.2%) | 757(37.2%) |
| 10001-20000 | 120 (6.3%) | 87(7.5 %) | 108(10.5%) | 171(8.4%) |
| Above 20000 | 23 (1.2%) | 32(2.8%) | 34(3.3 %) | 16(0.8%) |

**Table S2. Descriptive statistics and bivariate correlations of key variables in R1**

| **Variable**  **(V)** | **M** | **SD** | **V1** | **V2** | **V3** | **V4** | **V5** |
| --- | --- | --- | --- | --- | --- | --- | --- |
| V1 | 5.68 | 1.3 |  |  |  |  |  |
| V2 | 3.04 | 1.17 | -0.02（0.333） |  |  |  |  |
| V3 | 3.81 | 0.72 | .396**（0） | .070**（0.002） |  |  |  |
| V4 | 2.19 | 1.15 | -.196**（0） | .302**（0） | -.190**（0） |  |  |
| V5 | 5.33 | 2.75 | .162**（0） | -.076**（0.001） | .176**（0） | -.228**（0） |  |
| V6 | 9.36 | 1.24 | .243**（0） | .057*（0.013） | .318**（0） | -.149**（0） | .127**（0） |

* p < 0.05. ** p < 0.01. *** p < 0.001.

**Table S3. Descriptive statistics and bivariate correlations of key variables in R2**

| **Variable**  **(V)** | **M** | **SD** | **V1** | **V2** | **V3** | **V4** | **V5** |
| --- | --- | --- | --- | --- | --- | --- | --- |
| V1 | 4.81 | 1.86 |  |  |  |  |  |
| V2 | 3.95 | 0.73 | .083**（0.005） |  |  |  |  |
| V3 | 2.73 | 0.92 | .083**（0.005） | 0.025（0.386） |  |  |  |
| V4 | 2.77 | 0.79 | -.115**（0） | .111**（0） | .201**（0） |  |  |
| V5 | 6.27 | 2.41 | .035（0.23） | .060*（0.041） | -.262**（0） | -.306**（0） |  |
| V6 | 5.37 | 1.26 | .244**（0） | .111**（0） | .135**（0） | -.187**（0） | .074*（0.012） |

* p < 0.05. ** p < 0.01. *** p < 0.001.

**Table S4. Descriptive statistics and bivariate correlations of key variables in R3**

| **Variable**  **(V)** | **M** | **SD** | **V1** | **V2** | **V3** | **V4** | **V5** |
| --- | --- | --- | --- | --- | --- | --- | --- |
| V1 | 3.79 | 0.98 |  |  |  |  |  |
| V2 | 3.37 | 0.87 | .318**（0） |  |  |  |  |
| V3 | 3.88 | 0.75 | .461**（0） | .280**（0） |  |  |  |
| V4 | 2.90 | 0.91 | -.059（0.059） | .195**（0） | .01（0.749） |  |  |
| V5 | 10.60 | 3.51 | -.034（0.27） | -.077*（0.014） | -.041（0.187） | -.333**（0） |  |
| V6 | 3.78 | 0.74 | .388**（0） | .290**（0） | .502**（0） | -.051（0.102） | -.018（0.565） |

* p < 0.05. ** p < 0.01. *** p < 0.001.

Note.V1= Intention of Covid-19 vaccine, V2=Personal risk perception of Covid-19, V3= Personal benefit perception of Covid-19 vaccine, V4= Vaccine conspiracy theory trust,V5=Science literacy, V6= Expert trust in Covid-19

**Table S5. Descriptive statistics and bivariate correlations of key variables in R4**

| **Variable**  **(V)** | **M** | **SD** | **V1** | **V2** | **V3** | **V4** | **V5** |
| --- | --- | --- | --- | --- | --- | --- | --- |
| V1 | 3.45 | 0.90 |  |  |  |  |  |
| V2 | 3.42 | 0.89 | .310**（0） |  |  |  |  |
| V3 | 3.93 | 0.71 | .396**（0） | .288**（0） |  |  |  |
| V4 | 2.90 | 0.91 | -.051（0.228） | .169**（0） | -.001（0.978） |  |  |
| V5 | 10.60 | 3.51 | -.03（0.483） | -.034（0.273） | .011（0.718） | -.333**（0） |  |
| V6 | 3.75 | 0.78 | .415**（0） | .302**（0） | .471**（0） | -.01（0.757） | -.05（0.108） |

* p < 0.05. ** p < 0.01. *** p < 0.001.

**Table S6. Descriptive statistics and bivariate correlations of key variables in R5**

| **Variable (V)** | ***M*** | ***SD*** | **V1** | **V2** | **V3** | **V4** | **V5** |
| --- | --- | --- | --- | --- | --- | --- | --- |
| V1 | 3.80 | 0.90 |  |  |  |  |  |
| V2 | 3.63 | 0.80 | .544**(0) |  |  |  |  |
| V3 | 3.82 | 0.80 | .642**(0) | .620**(0) |  |  |  |
| V4 | 3.30 | 1.04 | .107**(0) | .317**(0) | .136**(0) |  |  |
| V5 | 4.48 | 2.69 | -.038(.089) | -.173**(0) | -.012(.581) | -.417**(0) |  |
| V6 | 6.81 | 2.31 | .586**(0) | .395**(0) | .536**(0) | -.057*(.01) | -.05*(0.025) |

Note.V1= Intention of influenza vaccine, V2=Personal risk perception of influenza, V3= Personal benefit perception of influenza vaccine, V4= Vaccine conspiracy theory trust,V5=Science literacy, V6= Expert trust in influenza
